# Supplementary material for: Health Literacy and Health Behavior: Associated Factors in Surabaya High School Students, Indonesia
Source: MDPI journal article supplement (doi:10.3390/ijerph18158111), 2021-07-30
Supplement: s1 [file s1]

## HEALTH PROMOTING SCHOOL OBSERVATION SHEETS FOR HIGH SCHOOL

### A. SCHOOL IDENTITY

1. School Number : .....
2. School Accreditation : A / B / C / D \* )
3. School Category : Public School/National Private School/International School \* )  
Year .....
4. The number of students : Total ..... male ... ..... female .....
5. Number of Class : .....
6. Number of Classrooms : .....
7. Total number of teachers
  - a. Mandatory Subject Teacher : .....
  - b. Physical Education Teacher : .....
  - c. Local Content Teacher : .....
  - d. Religion teacher : .....
8. Building Status : (Own / Grant / Rent \*)
9. School land area : ..... m<sup>2</sup>

\*) Choose the appropriate one

**B. IMPLEMENTATION OF HEALTH PROMOTING SCHOOL - HIGH SCHOOL PRIVATE VOCATIONAL SCHOOLS (TRIAS)**

**1. Health Education**

| No. | Statement                                                                                                                                                                                                 | Yes | No | Info |
|-----|-----------------------------------------------------------------------------------------------------------------------------------------------------------------------------------------------------------|-----|----|------|
| 1.  | Physical and Health Education are carried out in a curricular manner                                                                                                                                      |     |    |      |
| 2.  | The teacher makes a health education learning plan                                                                                                                                                        |     |    |      |
| 3.  | There is a teacher handbook and reading about health education                                                                                                                                            |     |    |      |
| 4.  | There are health education reading books                                                                                                                                                                  |     |    |      |
| 5.  | There is a physical education teacher                                                                                                                                                                     |     |    |      |
| 6.  | Physical and Health Education implemented as extracurricular                                                                                                                                              |     |    |      |
| 7.  | Have health education media (posters and others)                                                                                                                                                          |     |    |      |
| 8.  | Have a counseling teacher                                                                                                                                                                                 |     |    |      |
| 9.  | Measurement and recording of physical fitness are carried out                                                                                                                                             |     |    |      |
| 10. | Implementation of Adolescent Reproductive Health Education, HIV-AIDS and Narcotics on an extracurricular basis                                                                                            |     |    |      |
| 11. | Physical and Health Education are integrated in other subjects                                                                                                                                            |     |    |      |
| 12. | Physical fitness tests were carried out                                                                                                                                                                   |     |    |      |
| 13. | Have a teacher in charge of Health Promoting School Program                                                                                                                                               |     |    |      |
| 14. | There is an evaluation of health education                                                                                                                                                                |     |    |      |
| 15. | The active role of "peer educators" / "peer counselors" in health education                                                                                                                               |     |    |      |
| 16. | Implemented adolescent reproductive health education, HIV-AIDS and Narcotics in a curricular and extracurricular manner or integrated into subjects                                                       |     |    |      |
| 17. | Have a trained Health Promoting School Program teacher and enough in number                                                                                                                               |     |    |      |
| 18. | The existence of a partnership for Health Promoting School program with related agency (Community Health Center, Police, Indonesian Red Cross, Disaster Management Agency, and others Health Related NGO) |     |    |      |

**2. Health services**

| No. | Statement                                                                                             | Yes | No | Information |
|-----|-------------------------------------------------------------------------------------------------------|-----|----|-------------|
| 1.  | Carried out teenager health counseling                                                                |     |    |             |
| 2.  | Have health screening program                                                                         |     |    |             |
| 3.  | Measure Height and Weight of student                                                                  |     |    |             |
| 4.  | Provide with first aid and referral system                                                            |     |    |             |
| 5.  | There is supervision school shop/canteen                                                              |     |    |             |
| 6.  | Periodical health Examination in every 6 months (including height and weight monitoring)              |     |    |             |
| 7.  | Recording the results of health examination and height-weight monitoring at medical record books/card |     |    |             |
| 8.  | Have referral system when needed                                                                      |     |    |             |
| 9.  | There are trained Youth Health Cadres                                                                 |     |    |             |
| 10. | Have counseling services for teenagers                                                                |     |    |             |
| 11. | Regular supervision of school cafeteria stalls                                                        |     |    |             |

| No. | Statement                                                                                        | Yes | No | Information |
|-----|--------------------------------------------------------------------------------------------------|-----|----|-------------|
| 12. | Supervision of food vendors around the school                                                    |     |    |             |
| 13. | Have health promoting school funds                                                               |     |    |             |
| 14. | Youth Health Cadres amount already reach $\leq 10\%$                                             |     |    |             |
| 15. | Adolescent health counseling by "peer educators" / "peer counselors"                             |     |    |             |
| 16. | Communication forum activities / focus group discussions of "peer educators" / "peer counselors" |     |    |             |
| 17. | Number of Youth Health Cadres who have been trained $\geq 10\%$                                  |     |    |             |

### 3. Healthy School Environment

| No. | Statement                                                                       | Yes | No | Information |
|-----|---------------------------------------------------------------------------------|-----|----|-------------|
| 1.  | Provide water that meets terms health                                           |     |    |             |
| 2.  | Have a place for washing hand                                                   |     |    |             |
| 3.  | Have toilets that works                                                         |     |    |             |
| 4.  | Provide trash can                                                               |     |    |             |
| 5.  | There is a functioning sewerage system                                          |     |    |             |
| 6.  | There is a yard/field                                                           |     |    |             |
| 7.  | Have a health promoting school corner                                           |     |    |             |
| 8.  | Have health poster about the danger of cigarettes                               |     |    |             |
| 9.  | Have health poster about the danger of Drug abuse                               |     |    |             |
| 10. | Have drainage system                                                            |     |    |             |
| 11. | Do mosquito prevention program once a week                                      |     |    |             |
| 12. | Have a canteen / school shop                                                    |     |    |             |
| 13. | Have fence                                                                      |     |    |             |
| 14. | Have prayer room                                                                |     |    |             |
| 15. | Existence of supervision for school canteen/shop in a routine manner            |     |    |             |
| 16. | Have secure and sturdy fence                                                    |     |    |             |
| 17. | Have greenery/shade                                                             |     |    |             |
| 18. | Have counseling room                                                            |     |    |             |
| 19. | Have health promoting school room with simple equipment *)                      |     |    |             |
| 20. | School Environment free from mosquito flick                                     |     |    |             |
| 21. | Enforce policy for school area free of cigarettes, drugs and alcohol            |     |    |             |
| 22. | Distance from blackboard to frontline bench 2.5 m                               |     |    |             |
| 23. | There are hand washers in several places with running water / faucets and soap  |     |    |             |
| 24. | The facilities for school canteen infrastructure meet health requirements       |     |    |             |
| 25. | There is a clean & healthy canteen officer                                      |     |    |             |
| 26. | Have thrash bin in each class and rubbish shelter at school                     |     |    |             |
| 27. | Have student's and teacher's toilets which fulfill health and cleanliness terms |     |    |             |
| 28. | Have large enough field for ceremony and exercise                               |     |    |             |

| No. | Statement                                                                                                                             | Yes | No | Information |
|-----|---------------------------------------------------------------------------------------------------------------------------------------|-----|----|-------------|
| 29. | There is a safe and beautiful fence                                                                                                   |     |    |             |
| 30. | Have school garden                                                                                                                    |     |    |             |
| 31. | Has its own health promoting school room with complete equipment **)                                                                  |     |    |             |
| 32. | The creation of schools without cigarettes, free of drugs and alcohol                                                                 |     |    |             |
| 33. | Have a healthy, safe and nutritious menu with trained school canteen officer                                                          |     |    |             |
| 34. | Rubbish directly transported and thrown away to the final disposal place out of school                                                |     |    |             |
| 35. | Toilet ratio for students                                                                                                             |     |    |             |
|     | male: 1: 40                                                                                                                           |     |    |             |
|     | female: 1:25                                                                                                                          |     |    |             |
| 36. | Have a closed used water discharge system                                                                                             |     |    |             |
| 37. | There are parks / school gardens that are utilized and labeled (for learning facilities) and processing the results of school gardens |     |    |             |
| 38. | Classrooms meet health requirements (adequate ventilation and lighting)                                                               |     |    |             |
| 39. | Minimum class density of 1: 1.5-1.75 m2                                                                                               |     |    |             |
| 40. | Has ideal health promoting school space and equipment ***)                                                                            |     |    |             |

**Note :**

**UKS room with simple equipment: \*)**

- Bed
- Weight scales, height gauge, Snellen chart
- First aid kit and simple drugs (betadine, ORS, paracetamol)

**UKS room with full equipment \*\*)**

- Bed
- Weight scales, height gauge, Snellen chart
- First aid kit and medicines (betadin, ORS, paracetamol)
- Medicine cabinets, reference books, medical record, posters, organizational structure, picket schedule the place washing up hand/sink, student morbidity data.

**UKS room with ideal equipment \*\*\*)**

- Bed
- Weight scales, height gauge, snellen chart
- First aid kit and medicines (betadin, ORS, paracetamol)
- Medicine cabinets, reference books, medical record, posters, organizational structure, picket schedule, hand wash / sink, student morbidity data
- Dental Equipment units
- Examples of body, bone / torso models
- etc.

Surabaya, ... .., 2019

School Principal\*)

(.....)

NIP / NRK

\*). Hand Sign of school principal and school stamp

**Table** Health-promoting school level in 15 high schools in Surabaya, Indonesia.

|                                      | Public<br>School | Private<br>School | Vocational<br>School | Total          |
|--------------------------------------|------------------|-------------------|----------------------|----------------|
| Health Education                     |                  |                   |                      |                |
| Minimum                              | 1 (20.00%)       | 3 (60.00%)        | 1 (20.00%)           | 5 (33.33%)     |
| Standard                             | 2 (40.00%)       | 0 (0.00%)         | 1 (20.00%)           | 3 (20.00%)     |
| Optimum                              | 2 (40.00%)       | 0 (0.00%)         | 0 (0.00%)            | 2 (13.33%)     |
| Perfect                              | 0 (0.00%)        | 2 (40.00%)        | 3 (60.00%)           | 5 (33.33%)     |
| Health Service                       |                  |                   |                      |                |
| Minimum                              | 5 (100.00%)      | 5 (100.00%)       | 3 (60.00%)           | 13<br>(86.67%) |
| Standard                             | 0 (0.00%)        | 0 (0.00%)         | 1 (20.00%)           | 1 (6.67%)      |
| Optimum                              | 0 (0.00%)        | 0 (0.00%)         | 1 (20.00%)           | 1 (6.67%)      |
| School Sanitation                    |                  |                   |                      |                |
| Minimum                              | 4 (80.00%)       | 5 (100.00%)       | 5 (100.00%)          | 14<br>(93.33%) |
| Standard                             | 1 (20.00%)       | 0 (0.00%)         | 0 (0.00%)            | 1 (6.67%)      |
| Health Promotion School<br>(Overall) |                  |                   |                      |                |
| Minimum                              | 5 (100.00%)      | 3 (60.00%)        | 2 (40.00%)           | 10<br>(66.67%) |
| Standard                             | 0 (0.00%)        | 2 (40.00%)        | 3 (60.00%)           | 5 (33.33%)     |
